# Supplementary material for: UPLC-QTOF/MS based metabolomics reveals metabolic alterations associated with severe sepsis
Source: Royal Society of Chemistry journal article supplement (doi:10.1039/c6ra07514b), 2016-01-01
Supplement: c6ra07514b1.pdf [file c6ra07514b1.pdf]

**Table S1.** Clinical characteristics of the severe sepsis patients

| Parameter              | Healthy volunteers | SS Patients | P value |
|------------------------|--------------------|-------------|---------|
| Age, years             | 55.3±10.2          | 57.2±8.8    | 0.33    |
| Sex (male/female)      | 360/222            | 340/206     | 0.72    |
| BMI, kg/m <sup>2</sup> | 24.15±1.27         | 25.32±3.52  | 0.69    |
| DBP, mmHg              | 75.13±8.16         | 76.44±8.21  | 0.49    |
| SBP, mmHg              | 147.10±22.31       | 145.09±23.3 | 0.66    |
|                        |                    | 8           |         |
| Serum FBG, mmol/L      | 5.7±1.3            | 5.9±1.5     | 0.19    |
| Serum TG, mmol/L       | 2.5±0.4            | 1.8±0.3     | 0.04    |
| Serum TC, mmol/L       | 4.7±0.6            | 4.8±0.7     | 0.53    |
| Serum insulin, mmol/L  | 12.4±3.7           | 25.9±6.1    | 0.0042  |
| PCT, ng/ml             | 10.3±2.5           | 5.7±1.6     | 0.0006  |
| ISS                    | 54.6±7.2           | 33.5±7.7    | 0.0008  |

Note: A-AP, A-amyloid protein; BMI, body mass index; DBP, diastolic blood pressure; FBG, fasting (2 hours postprandial) blood glucose; SBP, systolic blood pressure; TC, total cholesterol; TG, triglycerides; ISS: Injury severity score. The p values less than 0.05 were considered significant.

**Table S2.** Information of SS biomarkers detected by UPLC-MS in negative ion mode

| No | VIP   | Rt   | m/z      | Compound ID | Formula    | Mass Error (ppm) | Description            | Anova (p) | Trend |
|----|-------|------|----------|-------------|------------|------------------|------------------------|-----------|-------|
| 1  | 15.84 | 2.78 | 165.0546 | HMDB00748   | C9H10O3    | -1.54            | 3-Phenyllactic acid    | 0.0007    | ↑     |
| 2  | 27.83 | 1.62 | 211.0635 | HMDB00913   | C10H12O5   | 1.05             | Vanillic acid          | 0.0021    | ↓     |
| 3  | 27.53 | 1.28 | 194.0449 | HMDB06116   | C9H9NO4    | -1.92            | 3-Hydroxyhippuric acid | 0.0002    | ↑     |
| 4  | 23.21 | 2.69 | 129.0556 | HMDB00695   | C6H10O3    | -0.62            | Ketoleucine            | 0.0035    | ↓     |
| 5  | 18.16 | 1.57 | 357.1306 | HMDB01069   | C16H18N6O4 | -0.95            | 2-Phenylaminoadenosine | 0.0411    | ↓     |
| 6  | 11.19 | 3.80 | 210.0796 | HMDB01434   | C10H13NO4  | 0.65             | 3-Methoxytyrosine      | 0.0032    | ↑     |

**Table S3.** ROC curve analysis of potential biomarkers in SS detected by UPLC/MS in negative ion mode

| <b>No</b> | <b>Metabolite</b>      | <b>AUC</b> | <b>Sensitivity (%)</b> | <b>Specificity (%)</b> |
|-----------|------------------------|------------|------------------------|------------------------|
| 1         | 3-Phenyllactic acid    | 0.993      | 98.2                   | 99.3                   |
| 2         | Vanillactic acid       | 0.885      | 92.1                   | 91.8                   |
| 3         | 3-Hydroxyhippuric acid | 0.981      | 63.2                   | 82.4                   |
| 4         | Ketoleucine            | 0.876      | 93.7                   | 92.1                   |
| 5         | 2-Phenylaminoadenosine | 0.885      | 81.2                   | 97.3                   |
| 6         | 3-Methoxytyrosine      | 0.802      | 81.3                   | 87.2                   |
